# Supplementary material
Source: PubMed Central journal article supplement (PMC10192203)

□ Control    ■ Schistosomiasis

Male

Female

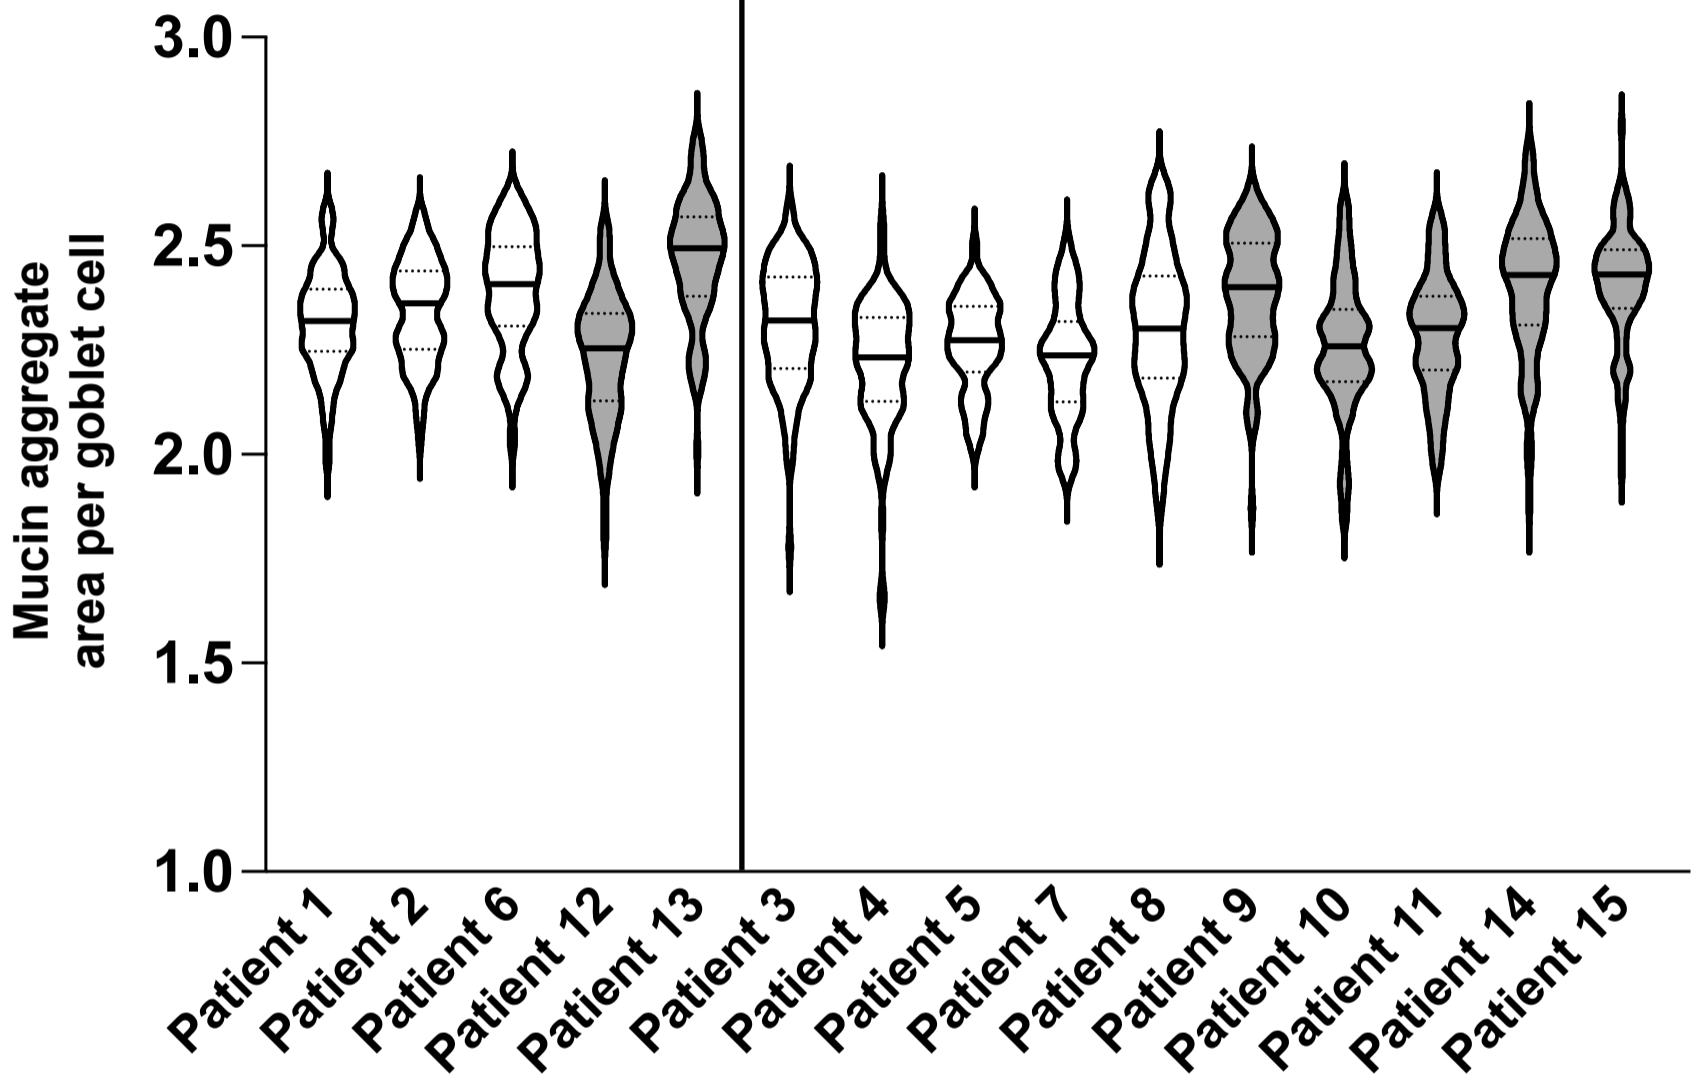

Supplement: NIHMS1886328-supplement-fS1.pdf [file NIHMS1886328-supplement-fS1.pdf]

**Fig. S2**

□ Control      ■ Schistosomiasis

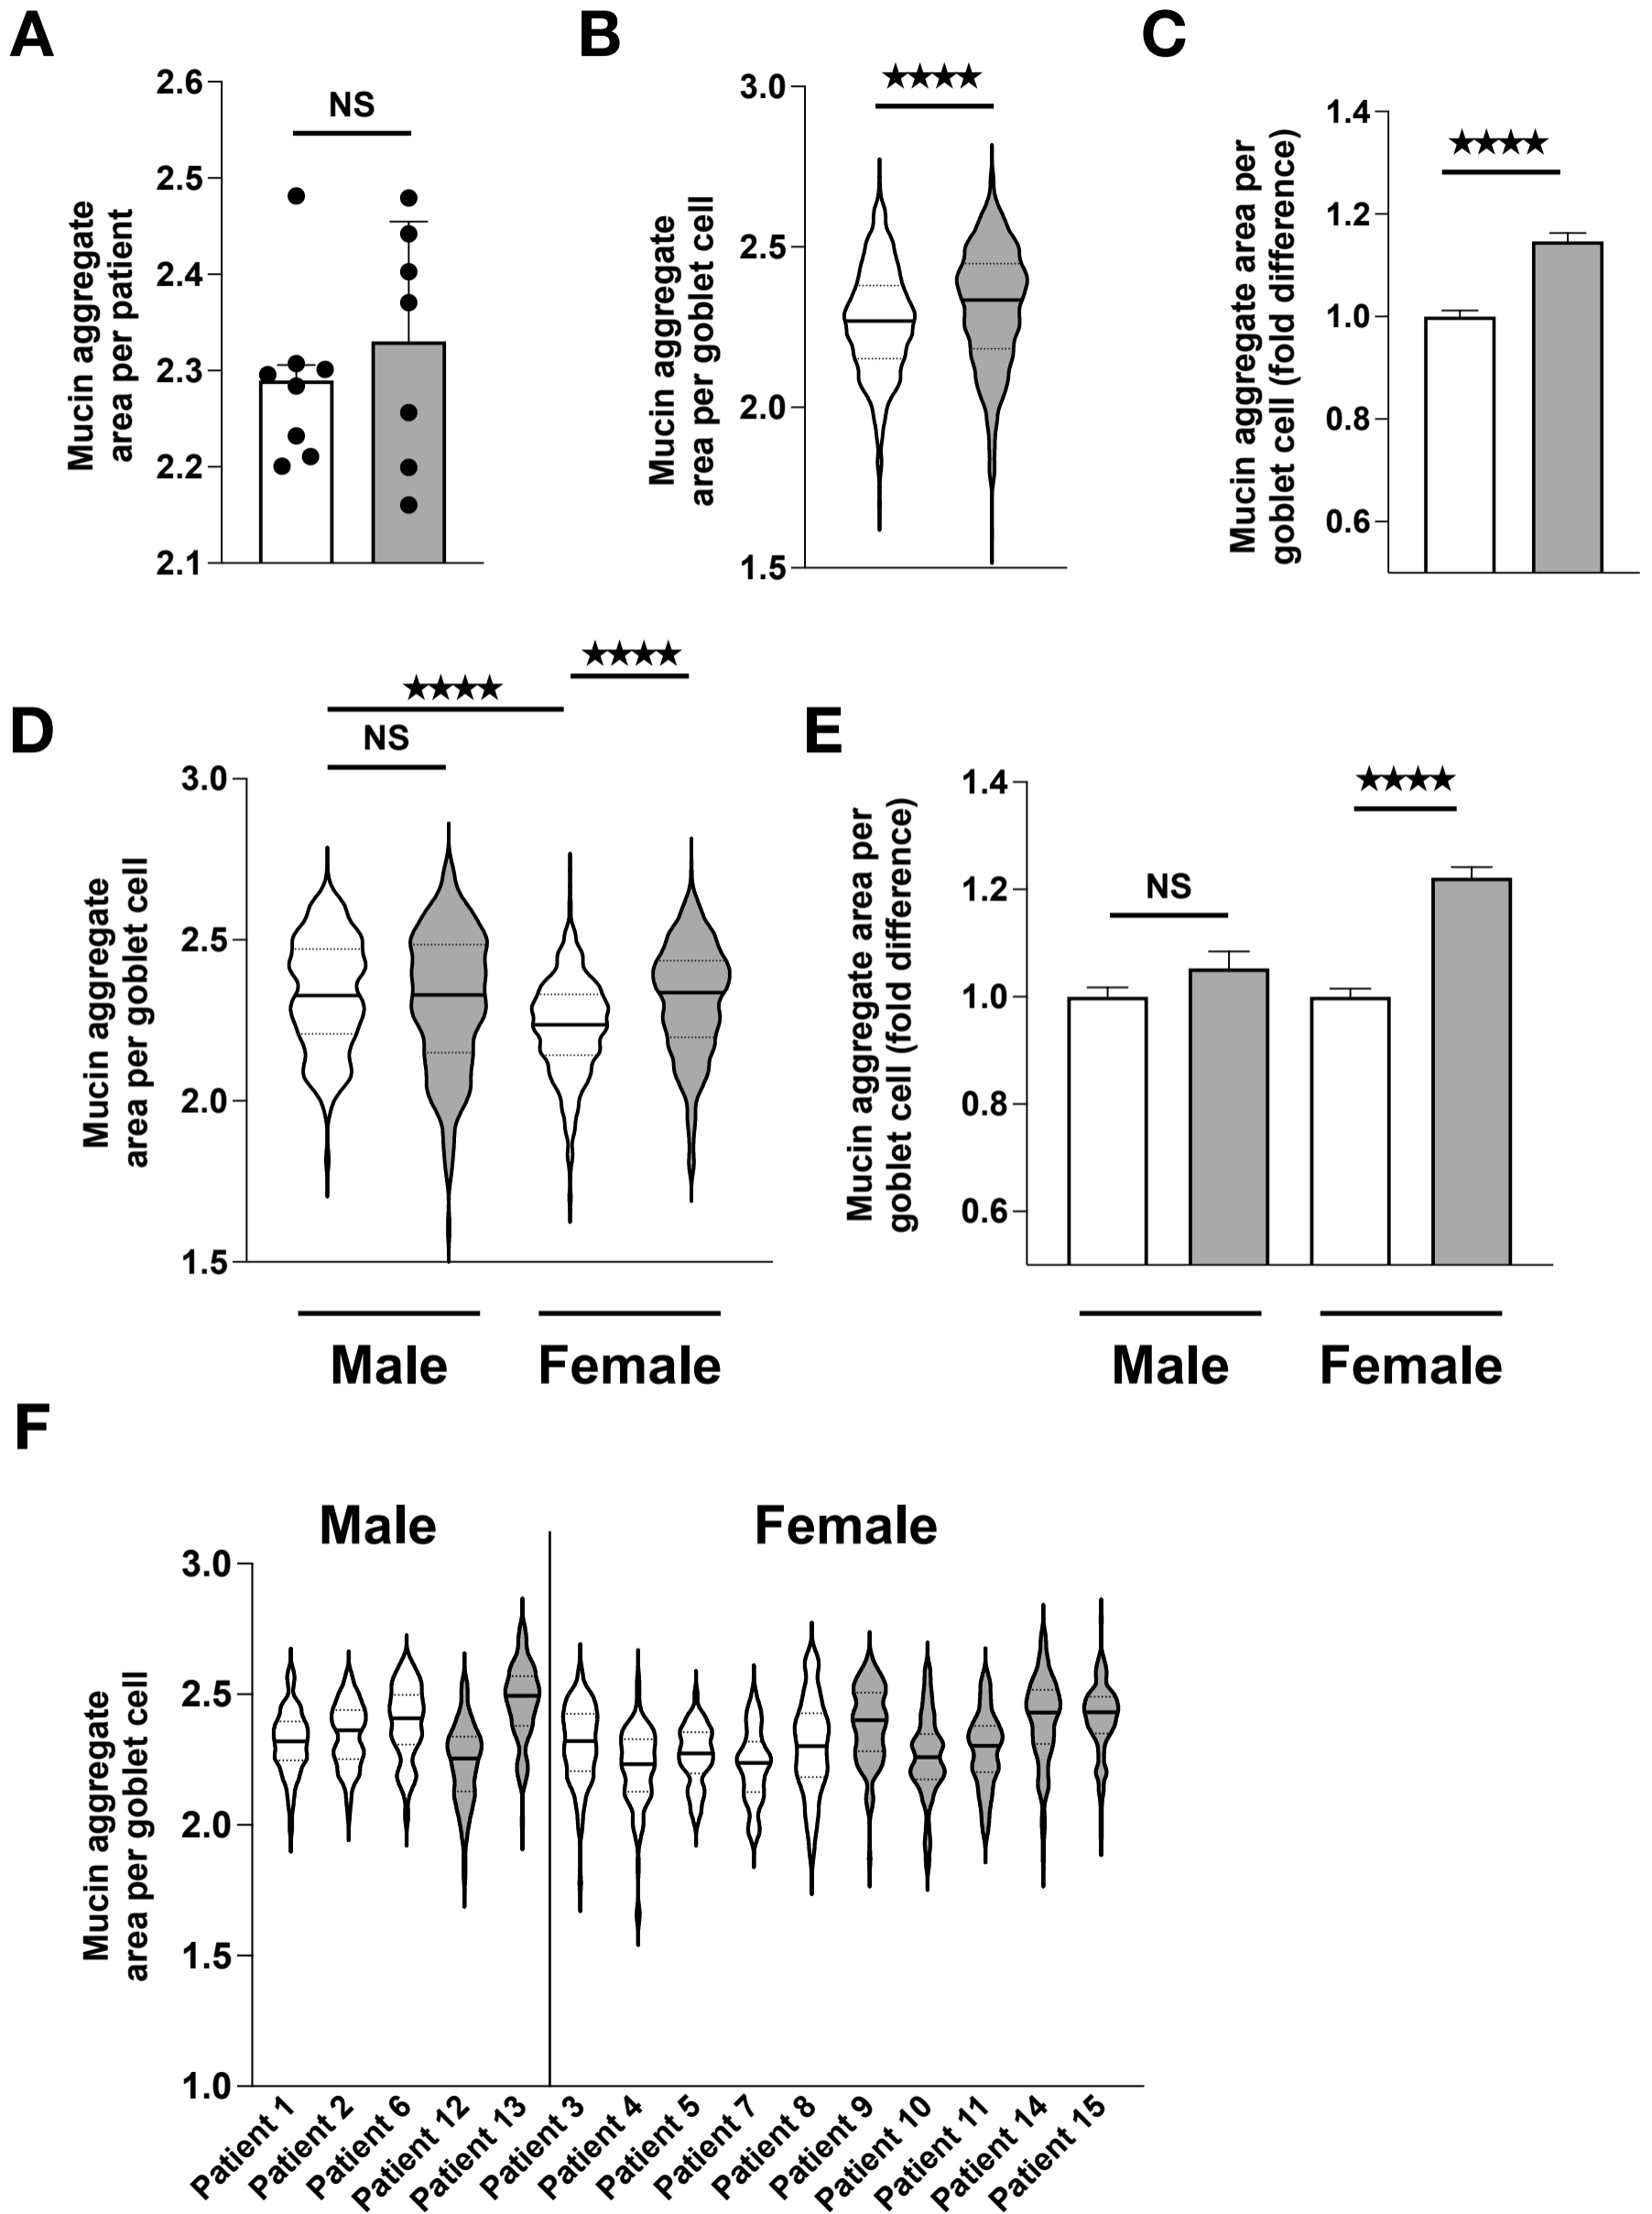

Supplement: NIHMS1886328-supplement-fS2.pdf [file NIHMS1886328-supplement-fS2.pdf]
